# Supplementary material for: Hierarchical assembly of smectic liquid crystal defects at undulated interfaces
Source: Royal Society of Chemistry journal article supplement (doi:10.1039/d0sm01112f), 2020-01-01
Supplement: d0sm01112f1.pdf [file d0sm01112f1.pdf]

## Electronic Supplementary Information:

### Hierarchical assembly of smectic liquid crystal defects at undulated interfaces

Ryan S. Preusse,<sup>a</sup> Elizabeth R. George,<sup>a</sup> S. Ali Aghvami,<sup>b</sup> Timothy M. Otchy,<sup>c</sup> and Mohamed Amine Gharbi<sup>\*a</sup>

<sup>a</sup> Department of Physics, University of Massachusetts Boston, Boston, MA 02125, United States of America. Fax: +1 617 287 6050; Tel: +1 617 287 5997; \*E-mail: [mohamed.gharbi@umb.edu](mailto:mohamed.gharbi@umb.edu)

<sup>b</sup> Department of Biology and Neurophotonics Center, Boston University, Boston, MA 02215, United States of America.

<sup>c</sup> Department of Physics, Brandeis University, Waltham, MA 02453, United States of America.

#### Video Caption:

**Video S1.** Polarized optical microscopy video showing the nematic to smectic A phase transition and the assembly of disclinations and FCDs around them.

**Video S2.** Bright field optical microscopy video describing the formation of FCDs and disclinations near the nematic-smectic A phase transition.

**Video S3.** Fluorescence optical microscopy video describing the formation of FCDs and disclinations near the nematic-smectic A phase transition.
